# Supplementary material for: Lineage-specific events underlie aortic root aneurysm pathogenesis in Loeys-Dietz syndrome
Source: JCI journal article supplement (doi:10.1172/jci123547), 2019-01-06
Supplement: sd1 [file 1]

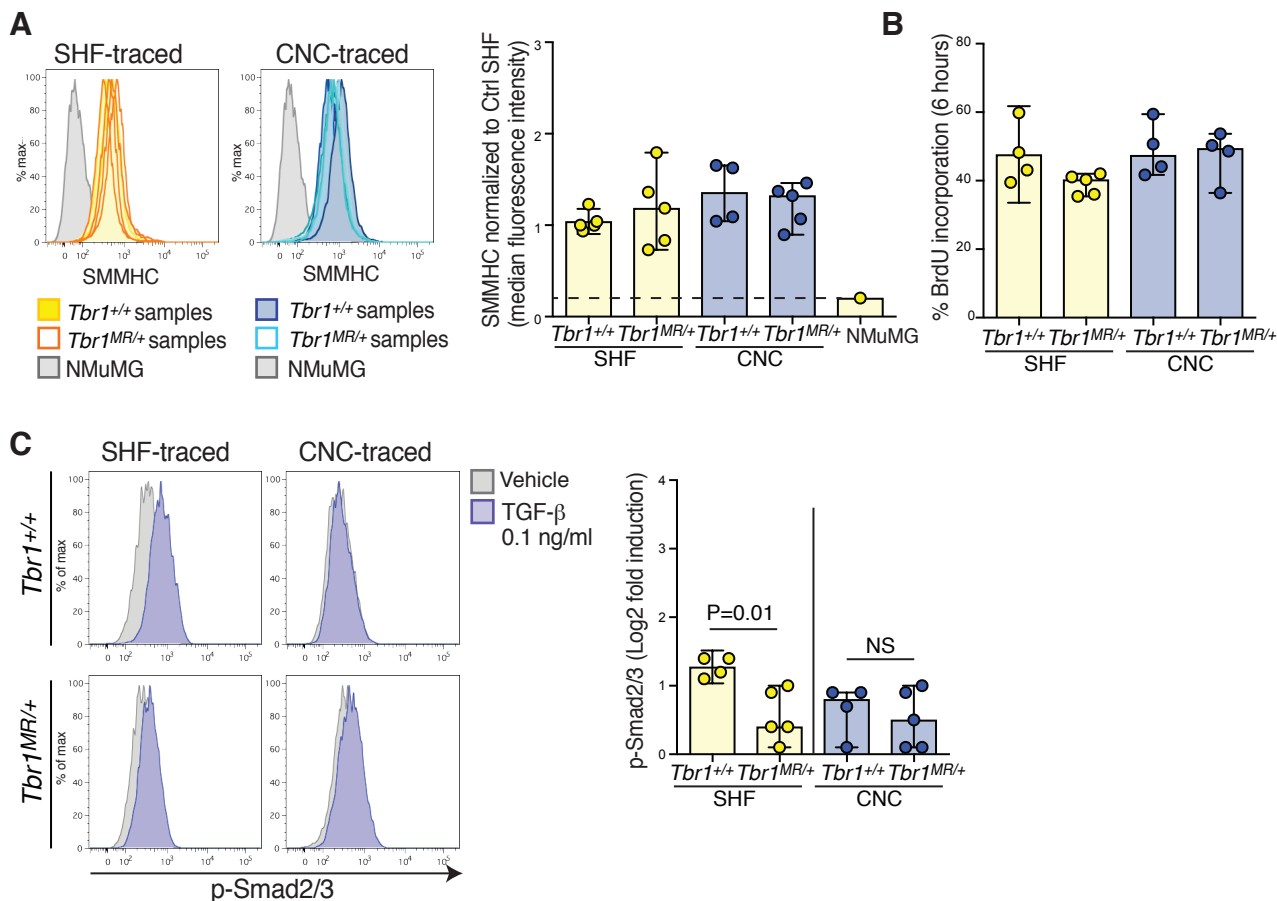

**Supplementary Figure 1. Defective induction of p-Smad2/3 in response to 0.1 ng/ml TGF- $\beta$ 1 in SHF-, but not in CNC-derived VSMCs generated from  $Tbr1^{MR/+}$  mice.**

(A) Histogram plots and quantification of smooth muscle myosin heavy chain (SMMHC) expression as assessed by intracellular flow cytometry in control ( $Tbr1^{+/+}$ ) and mutant ( $Tbr1^{MR/+}$ ) SHF- and CNC-derived VSMCs, and in the NMuMG epithelial cell line (negative control) (SHF samples: control n=5, mutant n=5; CNC samples, control n=4, mutant n=5). No significant differences were found between lineage-traced VSMCs. (B) Quantification of bromodeoxyuridine (BrdU) incorporation as assessed by intracellular flow cytometry in SHF- and CNC-derived VSMCs of the indicated genotypes (SHF samples: control n=4, mutant n=5; CNC samples, control n=4, mutant n=4). No significant differences were found. (C) Flow cytometry histogram plot and quantification of p-Smad2/3 induction over baseline in serum-starved SHF- and CNC-derived VSMCs from mice of the indicated genotypes after exposure to 0.1 ng/ml of TGF- $\beta$ 1 for 1 hour. Levels of p-Smad2/3 were assessed by phospho-flow cytometry using an antibody specific for p-Smad2/3 (SHF samples: control n=4, mutant n=5; CNC samples, control n=4, mutant n=4). *P* values shown refer to Kruskal-Wallis test with FDR-based multiple comparison correction. Numerical data are presented as scatter dot-plots with boxes, with the box denoting the mean; error bars identify the 95% confidence interval. NS, not significant.

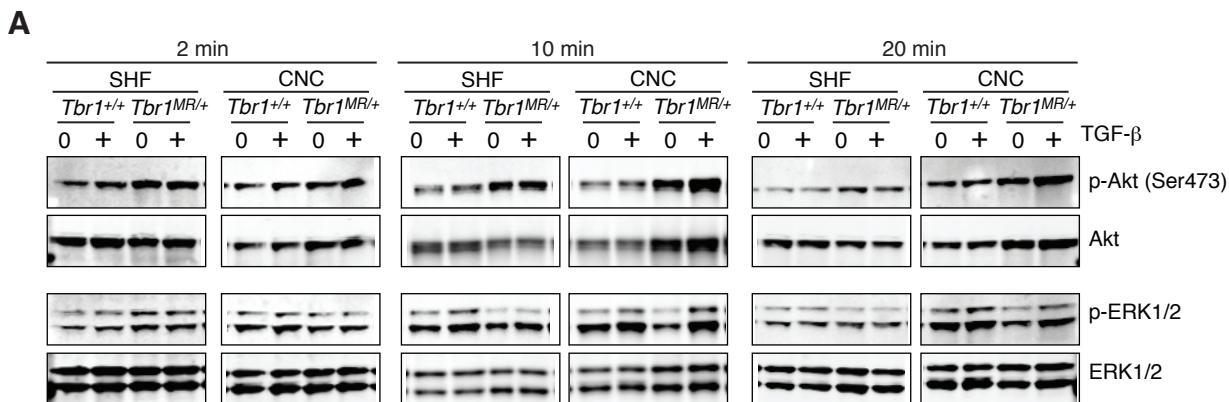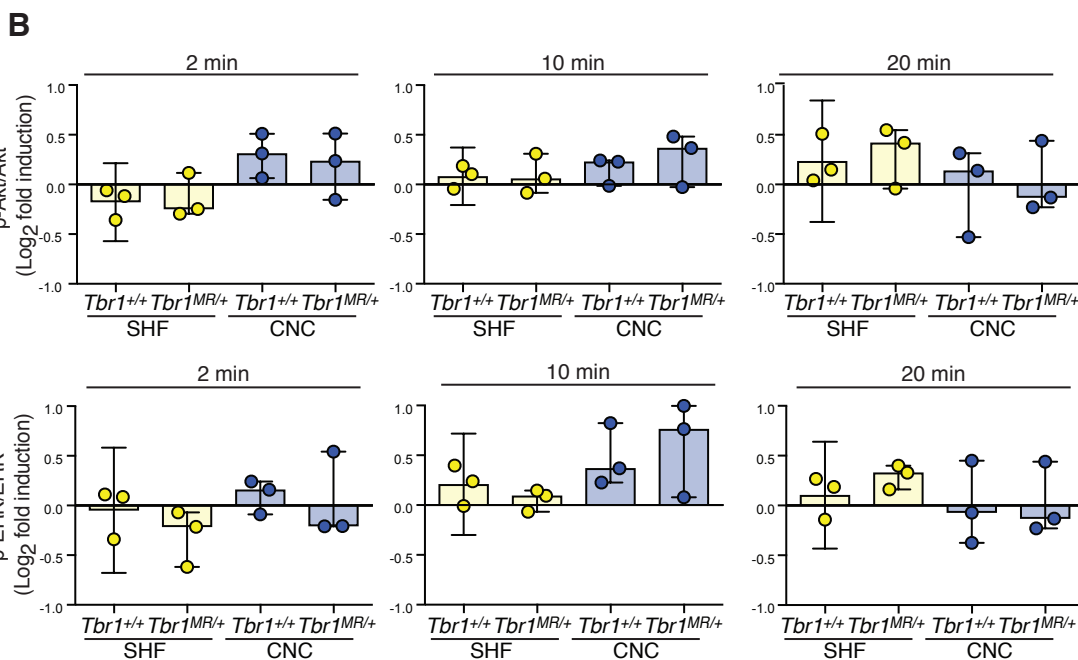

**Supplementary Figure 2. Similar induction of non-Smad pathways in control and mutant SHF- and CNC-derived VSMCs.**

(A) Representative immunoblot of protein lysates from serum-starved SHF- and CNC-derived VSMCs from mice of the indicated genotypes in the absence or presence of TGF-β1 (10 ng/ml) for the indicated duration. Levels of p-ERK (Thr202/Tyr204) and p-Akt (Ser473) were assessed and quantified (B) using antibodies specific for the respective phosphorylated form and normalized to total protein (n=3 for each condition). No significant differences were found. Numerical data are presented as scatter dot-plots with boxes, with the box denoting the mean; error bars identify the 95% confidence interval.

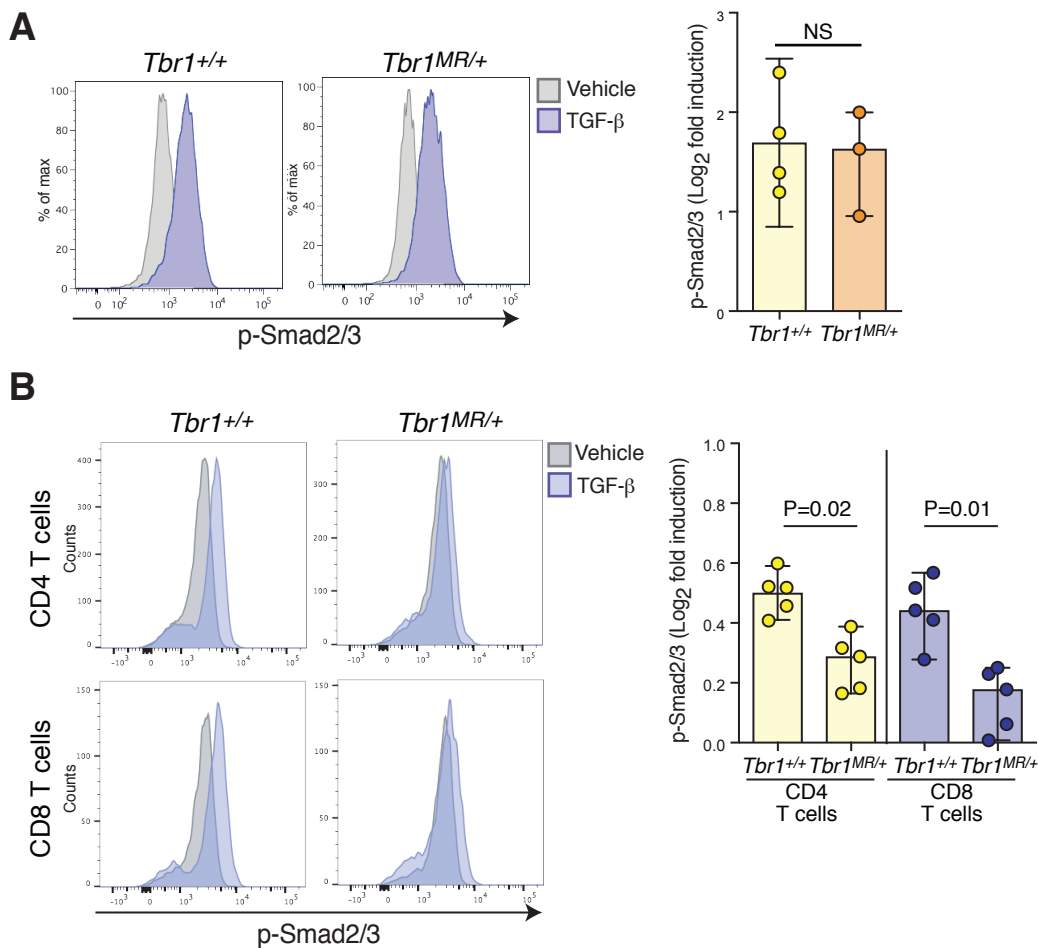

**Supplementary Figure 3. TGF- $\beta$ -dependent induction of Smad2/3 phosphorylation in adventitial fibroblasts and T lymphocytes from control and *Tbr1*<sup>MR/+</sup> LDS mice.**

(A) Flow cytometry histogram plots and quantification of p-Smad2/3 induction over baseline in serum-starved adventitial fibroblasts from mice of the indicated genotypes after exposure to 1 ng/ml of TGF- $\beta$ 1 for 1 hour. Levels of p-Smad2/3 were assessed by phospho-flow cytometry using an antibody specific for p-Smad2/3 (control n=4, mutant n=3); no significant differences were found. (B) Flow cytometry histogram plots and quantification of p-Smad2/3 induction over baseline in CD4<sup>+</sup> and CD8<sup>+</sup> T cells isolated from the spleen of mice of the indicated genotypes and stimulated with 0.5 ng/ml of TGF- $\beta$ 1 for 30 minutes. Levels of p-Smad2/3 were assessed by phospho-flow cytometry using an antibody specific for p-Smad2/3 (control n=5, mutant n=5). All *P* values refer to Kruskal-Wallis test with FDR-based multiple comparison correction. Numerical data are presented as scatter dot-plots with boxes, with the box denoting the mean; error bars identify the 95% confidence interval. NS, not significant.

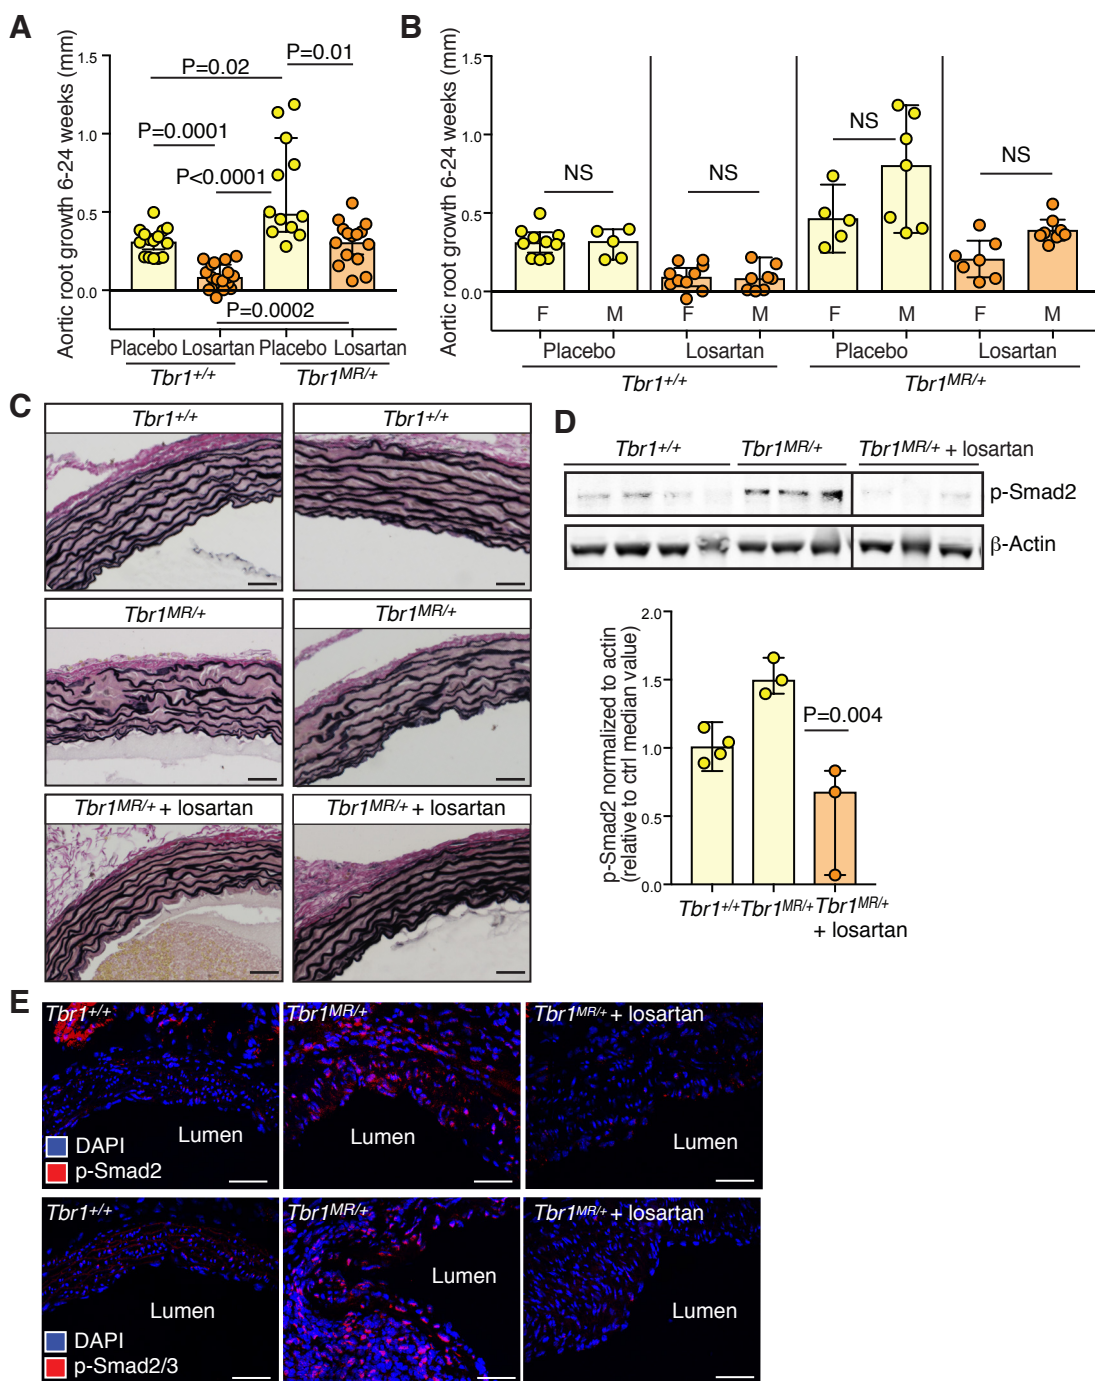

**Supplementary Figure 4. Treatment with losartan associates with reduced aortic root growth and p-Smad2/3 levels in the aortic root of *Tbr1*<sup>MR/+</sup> mice.** (A) Aortic root growth rate in control (*Tbr1*<sup>+/+</sup>) and mutant (*Tbr1*<sup>MR/+</sup>) mice treated with placebo or losartan (100 mg/kg/day) from 6 to 24 weeks of age (control n=15, mutant n=12; losartan samples, control n=18, mutant n=15). *P* values refer to Kruskal-Wallis test with FDR-based multiple comparison correction. (B) No sex-specific differences ( $P \leq 0.05$ ) were observed within any treatment group for data shown in panel A; F= females, M=males. (C) Representative Verhoeff-Van Gieson-stained sections from the aortic root of 24-week-old mice of the indicated treatment and genotype; scale bar is 40  $\mu$ m. Experiment was performed at least 3 times. (D) Immunoblot of protein lysates from the aortic root of 24-week-old mice of the indicated treatment and genotype probed with antibodies that recognize p-Smad2 and  $\beta$ -actin; a black vertical line separates lanes that were run on the same gel but were noncontiguous. Diagram shows levels of p-Smad2 after normalization to  $\beta$ -actin; *P* values refer to 1-way ANOVA followed by Holm-Sidak's multiple comparisons test. (E) Representative IF images of the aortic root of 24-week-old control and mutant mice stained with an antibody that recognizes p-Smad2 or with an unrelated antibody that recognizes p-Smad2/3; scale bar is 50  $\mu$ m. Image enhancement for visual display was applied uniformly to all panels. Numerical data are presented as scatter dot-plots with boxes, with the box denoting the mean; error bars identify the 95% confidence interval. NS, not significant.



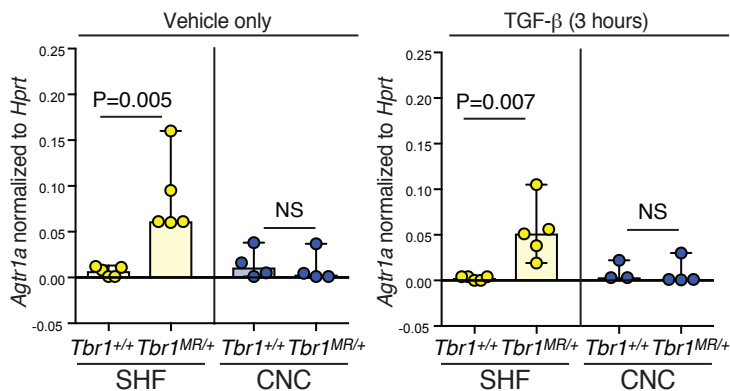

**Supplementary Figure 5. Upregulation of *Agtr1a* in SHF-, but not CNC-derived primary VSMCs from *Tbr1<sup>MR/+</sup>* mice.** Normalized *Agtr1a* mRNA expression in serum-starved SHF- and CNC-derived VSMCs from control (*Tbr1<sup>+/+</sup>*) and mutant (*Tbr1<sup>MR/+</sup>*) mice cultured in the presence or absence of TGF-β1 (10 ng/ml) for 3 hours; SHF samples: control n=5, mutant n=5; CNC samples, control n=4 (one not detectable after 3 hours of TGF-β treatment), mutant n=4; *P* values refer to Kruskal-Wallis test with FDR-based multiple comparison correction. Numerical data are presented as scatter dot-plots with boxes, with the box denoting the mean; error bars identify the 95% confidence interval. NS, not significant.

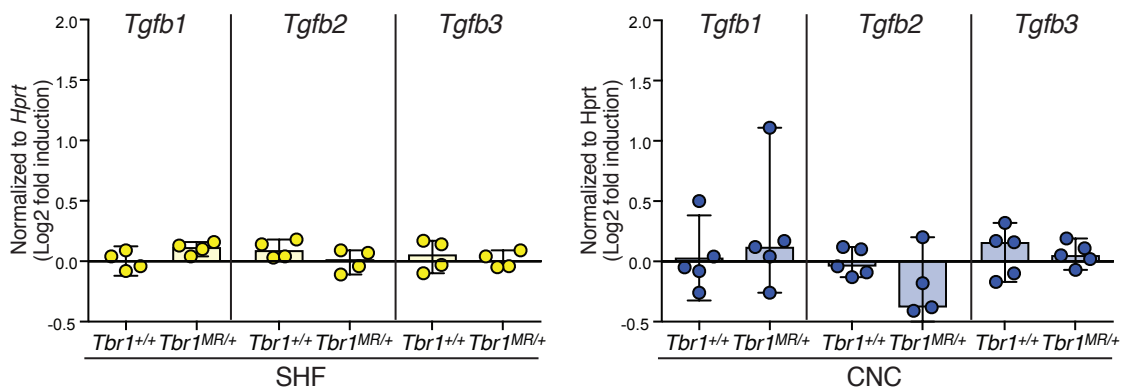

**Supplementary Figure 6. Induction of *Tgfb* isoforms in SHF- and CNC-derived primary VSMCs after treatment with AngII for 3 hours.** Induction of *Tgfb1*, *Tgfb2* and *Tgfb3* in serum-starved SHF- and CNC-derived VSMCs of the indicated genotype after exposure to AngII (10  $\mu$ M) for 3 hours (SHF samples: control n=5, mutant n=4; CNC samples, control n=5, mutant n=5). No significant differences were found. Numerical data are presented as scatter dot-plots with boxes, with the box denoting the mean; error bars identify the 95% confidence interval.

## SHF-traced tissue

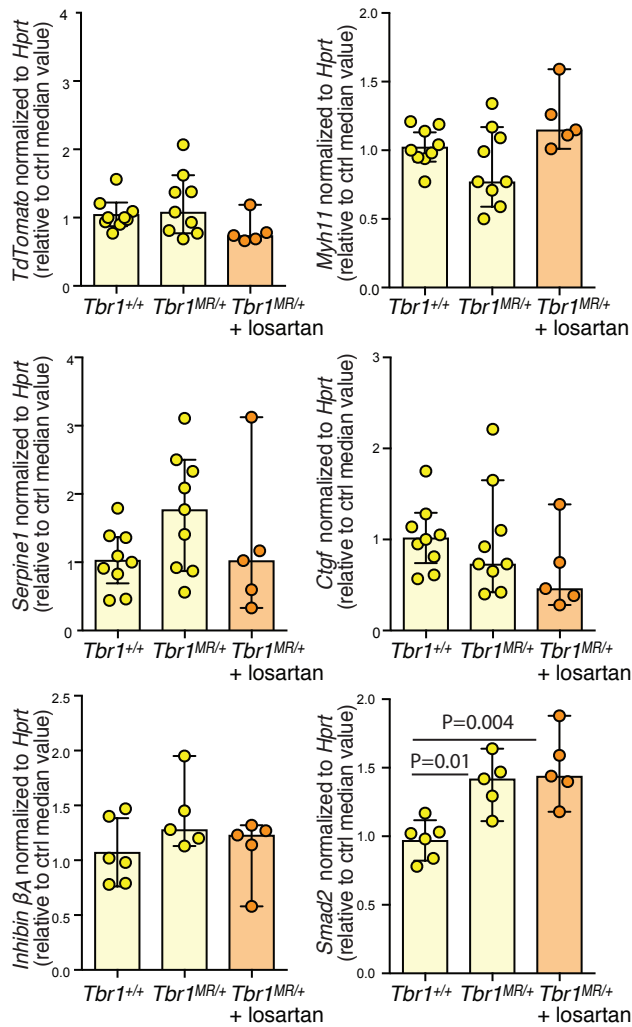

## CNC-traced tissue

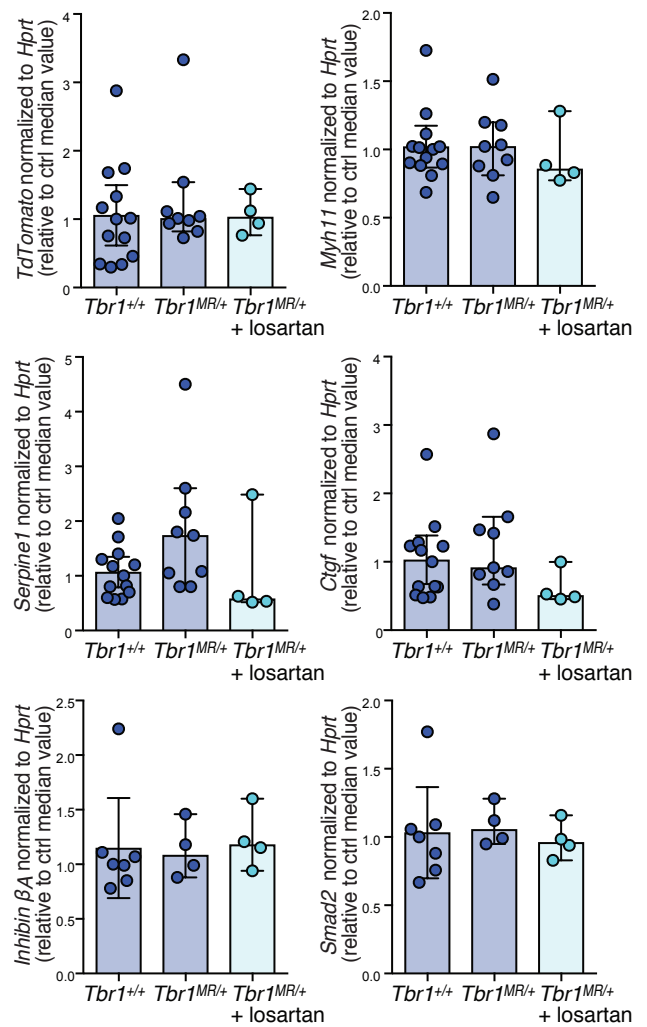

**Supplementary Figure 7. Treatment with losartan does not result in downregulation of *Smad2* or *Inhibin βA* in either SHF- or CNC-derived aortic root tissue of *Tbr1*<sup>MR/+</sup> mice.**

Expression of indicated transcripts in SHF- and CNC-derived aortic tissue obtained by laser-capture microdissection in 12-week-old lineage-traced mice of the indicated genotype and treatment (top two rows: SHF samples: control n=9, mutant n=9; losartan=5; CNC samples, control n=13, mutant n=9, losartan=4; bottom row: SHF samples: control n=6, mutant n=5; losartan=5; CNC samples, control n=7, mutant n=4, losartan=4). *P* values refer to Kruskal-Wallis test with FDR-based multiple comparison correction. Numerical data are presented as scatter dot-plots with boxes, with the box denoting the mean; error bars identify the 95% confidence interval.

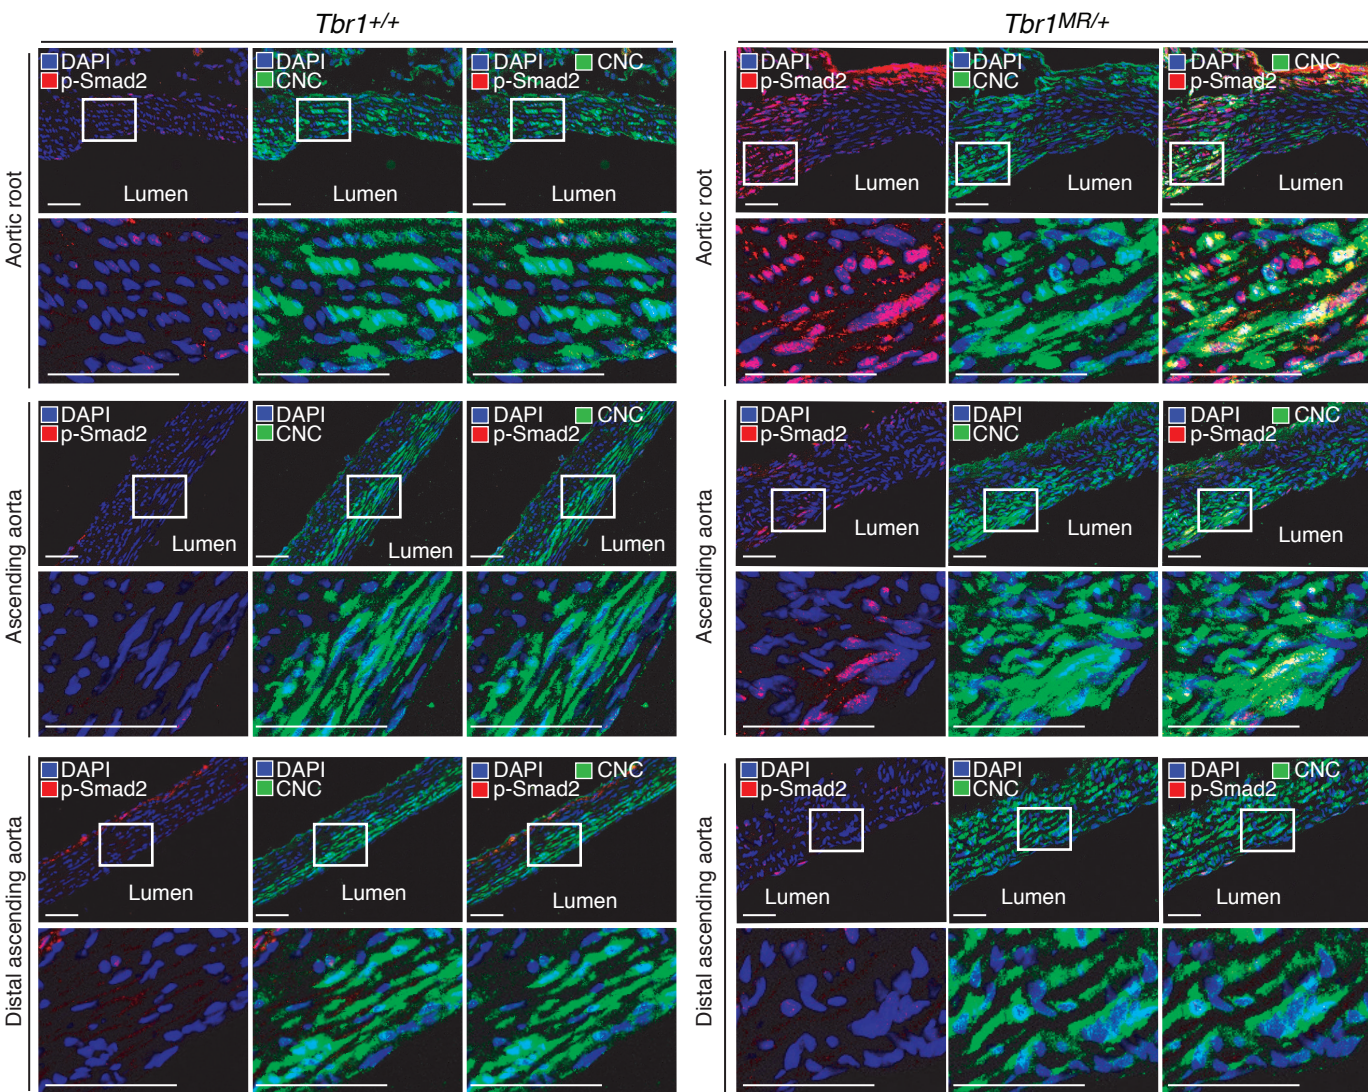

**Supplementary Figure 8. Smad2 phosphorylation is enriched in CNC-derived tissue in the aortic root media but not in the distal ascending aorta of *Tbr1*<sup>MR/+</sup> mice.**

Representative IF images showing staining for p-Smad2 in the aortic root and ascending aorta of 12-week-old control (*Tbr1*<sup>+/+</sup>) and mutant (*Tbr1*<sup>MR/+</sup>) mice in which CNC-derived tissue is marked by expression of YFP; insets mark areas shown at higher magnification below each panel; scale bar is 50  $\mu$ m. Image enhancement for visual display was applied uniformly to all panels. Experiment was conducted at least 3 times.

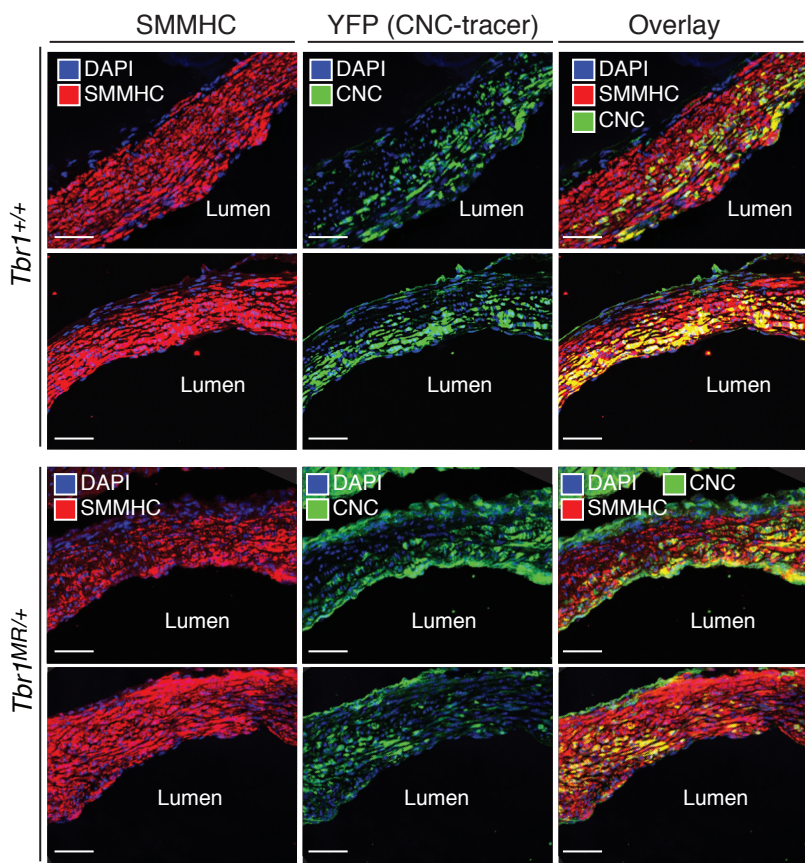

**Supplementary Figure 9. Overlap between CNC-derived and smooth muscle myosin heavy chain (SMMHC)-positive cells in the aortic root media of control and *Tbr1*<sup>MR/+</sup> mice.**

Representative IF images showing staining for the smooth muscle cell marker SMMHC in the aortic root of 12 week-old control (*Tbr1*<sup>+/+</sup>) and mutant (*Tbr1*<sup>MR/+</sup>) mice in which CNC-derived tissue is marked by expression of YFP; scale bar is 50  $\mu$ m. Image enhancement for visual display was applied uniformly to all panels. Experiment was conducted at least 3 times.



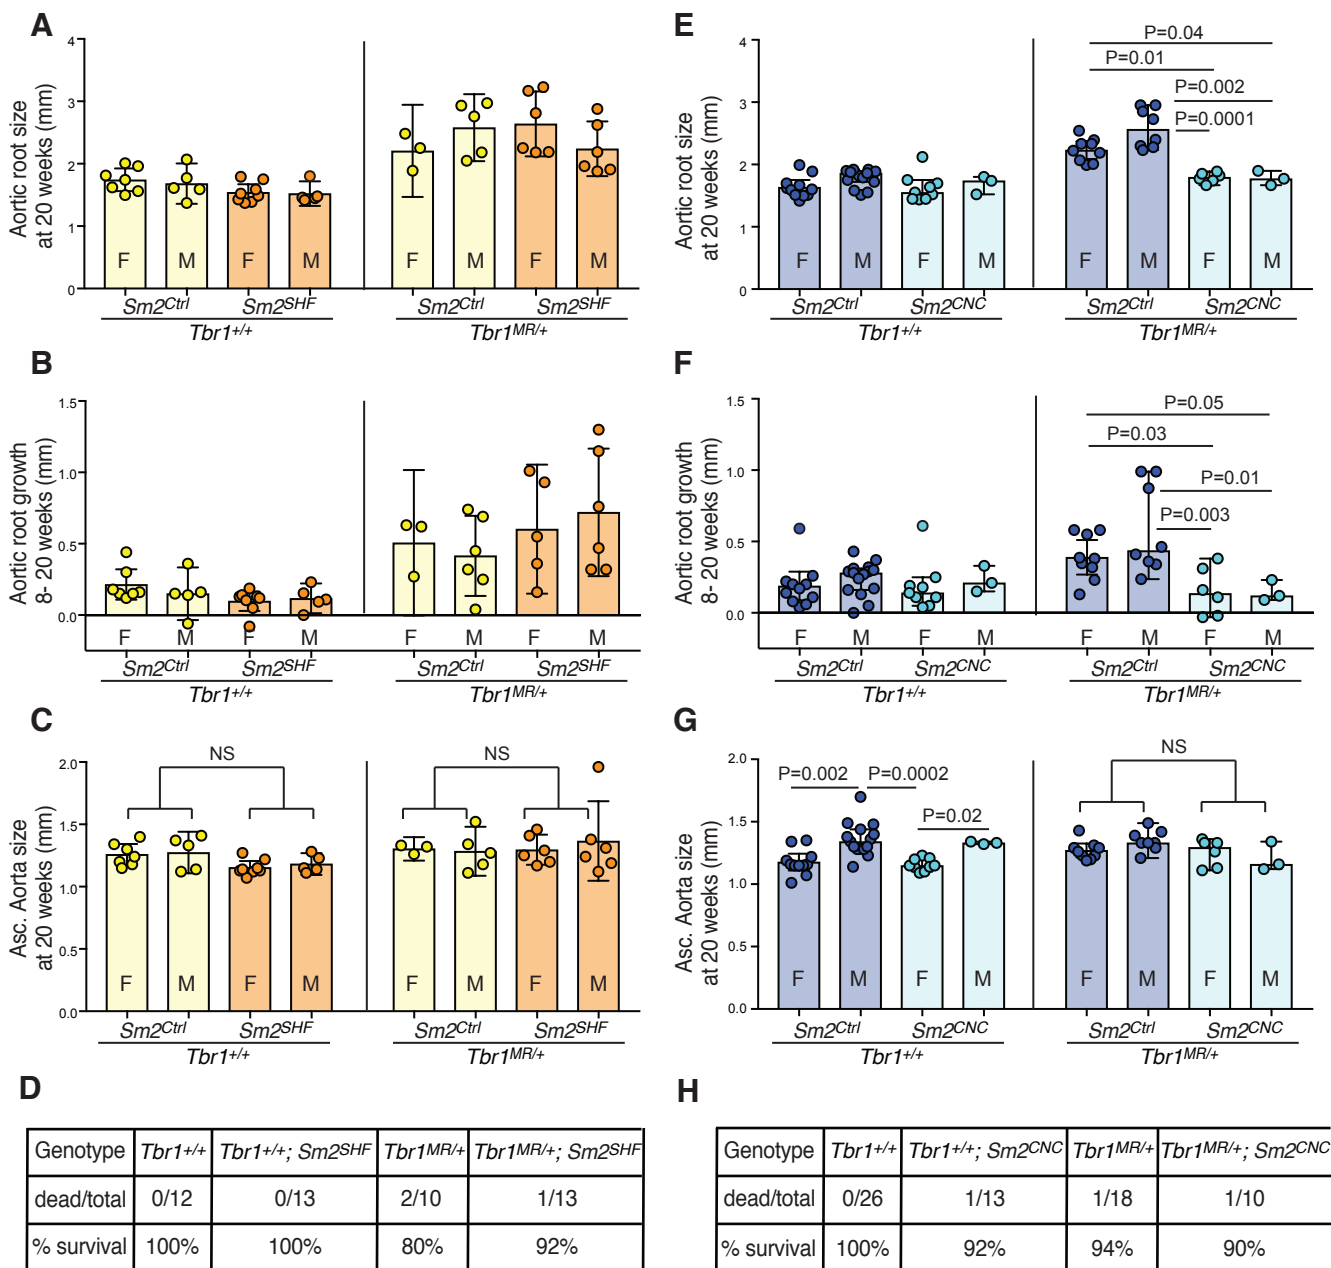

**Supplementary Figure 10. Deletion of *Smad2* in SHF- or CNC-derived cells does not result in sex-specific aortic root effects, nor aneurysm of the ascending aorta.**

Aortic root size (A) and growth rate (B) in 20 week-old female (F) and male (M) control (*Tbr1*<sup>+/+</sup>) and mutant (*Tbr1*<sup>MR/+</sup>) mice in which *Smad2* (*Sm2*) is not deleted (*Sm2*<sup>Ctrl</sup>) or deleted in SHF-derived cells (*Sm2*<sup>SHF</sup>). (C) Diameter of the proximal ascending aorta of 20 week-old mice of the indicated genotype. (D) Survival for mice of the indicated genotypes during the observational period (from 8 to 20 weeks of age); no significant differences were found by exact contingency test. Aortic root size (E) and growth rate (F) in 20 week-old mice of the indicated genotype in which *Smad2* (*Sm2*) is not deleted (*Sm2*<sup>Ctrl</sup>), or deleted in CNC-derived cells (*Sm2*<sup>CNC</sup>). (G) Diameter of the proximal ascending aorta in 20 week-old female and male mice of the indicated genotypes. This was the only cohort where sex-specific differences were found. (H) Survival for mice of the indicated genotypes during the observational period (from 8 to 20 weeks of age); no significant differences were found by exact contingency test. For all groups *n* ≥ 3; *P* values refer to Kruskal-Wallis test with FDR-based multiple comparison correction. Numerical data are presented as scatter dot-plots with boxes, with the box denoting the mean; error bars identify the 95% confidence interval. NS, not significant.



**Supplementary Table 1.**

This table lists the sex of all samples shown in figures and supplementary figures; M=male and F= female.

| Figure 1 | Control <i>Tbr1</i> <sup>+/+</sup> |                         | Mutant <i>Tbr1</i> <sup>MR/+</sup> |                                    |                         |                         |
|----------|------------------------------------|-------------------------|------------------------------------|------------------------------------|-------------------------|-------------------------|
| A        | F=1; M=0                           |                         | F=0; M=1                           |                                    |                         |                         |
| B        | F=13; M=12                         |                         | F=10; M=6                          |                                    |                         |                         |
| C        | F=1, M=0                           |                         | F=0, M=1                           |                                    |                         |                         |
| D        | F=0; M=1                           |                         | F=0; M=1                           |                                    |                         |                         |
| E        | F=0; M=1                           |                         | F=1; M=0                           |                                    |                         |                         |
| F        | F=0; M=3                           |                         | F=0; M=3                           |                                    |                         |                         |
| Figure 2 | Control <i>Tbr1</i> <sup>+/+</sup> |                         | Mutant <i>Tbr1</i> <sup>MR/+</sup> |                                    |                         |                         |
| A        | F=0; M=3                           |                         | F=0; M=3                           |                                    |                         |                         |
| B        | F=1; M=0                           |                         | F=0; M=1                           |                                    |                         |                         |
| Figure 3 | Control <i>Tbr1</i> <sup>+/+</sup> |                         | Mutant <i>Tbr1</i> <sup>MR/+</sup> |                                    |                         |                         |
|          | SHF-derived                        | CNC-derived             | SHF-derived                        | CNC-derived                        |                         |                         |
| C        | F=0; M=1                           | F=1 M=0                 | F=0; M=1                           | F=1 M=0                            |                         |                         |
| Figure 4 | Control <i>Tbr1</i> <sup>+/+</sup> |                         | Mutant <i>Tbr1</i> <sup>MR/+</sup> |                                    |                         |                         |
|          | SHF-derived                        | CNC-derived             | SHF-derived                        | CNC-derived                        |                         |                         |
| A        | F=3; M=2                           | F=2; M=3                | F=2; M=2                           | F=2; M=3                           |                         |                         |
| B        | F=2; M=1                           | F=2; M=1                | F=1; M=2                           | F=2; M=1                           |                         |                         |
| C        | F=2; M=2                           | F=2; M=2                | F=1; M=3                           | F=2; M=2                           |                         |                         |
| Figure 5 | Control <i>Tbr1</i> <sup>+/+</sup> |                         | Mutant <i>Tbr1</i> <sup>MR/+</sup> |                                    |                         |                         |
|          | SHF-derived                        | CNC-derived             | SHF-derived                        | CNC-derived                        |                         |                         |
| A        | F=3; M=2                           | F=2; M=2                | F=2; M=3                           | F=2; M=2                           |                         |                         |
| B        | F=2; M=3                           | F=2; M=2                | F=1; M=3                           | F=2; M=2                           |                         |                         |
| C        | F=1; M=0                           | F=0; M=1                | F=0; M=1                           | F=0; M=1                           |                         |                         |
| D        | F=2; M=3                           | F=2; M=3                | F=1; M=3                           | F=1; M=4                           |                         |                         |
| Figure 6 | Control <i>Tbr1</i> <sup>+/+</sup> |                         | Mutant <i>Tbr1</i> <sup>MR/+</sup> |                                    |                         |                         |
| B-SHF    | F=5; M=4                           |                         | F=3; M=6                           | LOS F=3; M=2                       |                         |                         |
| B-CNC    | F=3; M=10                          |                         | F=5; M=4                           | LOS F=3; M=1                       |                         |                         |
| Figure 7 | Control <i>Tbr1</i> <sup>+/+</sup> |                         | Mutant <i>Tbr1</i> <sup>MR/+</sup> |                                    |                         |                         |
| A        | F=0 M=1                            |                         | F=1, M=0                           |                                    |                         |                         |
| B        | F=0 M=1                            |                         | F=1, M=0                           |                                    |                         |                         |
| Figure 8 | Control <i>Tbr1</i> <sup>+/+</sup> |                         |                                    | Mutant <i>Tbr1</i> <sup>MR/+</sup> |                         |                         |
|          | Control                            | Smad2 <sup>SHFckO</sup> | Smad2 <sup>CNC</sup>               | Control                            | Smad2 <sup>SHFckO</sup> | Smad2 <sup>CNCckO</sup> |
| A        | F=7, M=5                           | F=8, M=5                |                                    | F=3, M=5                           | F=6, M=6                |                         |
| B        | F=11, M=15                         |                         | F=9, M=3                           | F=9, M=8                           |                         | F=6, M=3                |
| C        | F=1, M=2                           | F=2, M=1                | F=1, M=2                           | F=1, M=2                           | F=1, M=2                | F=0, M=3                |
| D        | F=0, M=3                           | F=1, M=2                | F=1, M=2                           | F=0, M=3                           | F=0, M=3                | F=1, M=2                |
| Figure 9 | Control <i>Tbr1</i> <sup>+/+</sup> |                         |                                    | Mutant <i>Tbr1</i> <sup>MR/+</sup> |                         |                         |
|          | Control                            |                         |                                    | Control                            | Smad2 <sup>SHFckO</sup> | Smad2 <sup>CNCckO</sup> |
| A        | F=2; M=0                           |                         |                                    | F=2; M=0                           | F=1; M=1                |                         |
| B        | F=0; M=2                           |                         |                                    | F=0; M=2                           |                         | F=0; M=2                |

| Sup. Fig. 1 | Control <i>TbrI</i> <sup>+/+</sup> |                                    | Mutant <i>TbrI</i> <sup>MR/+</sup> |               |
|-------------|------------------------------------|------------------------------------|------------------------------------|---------------|
|             | SHF-derived                        | CNC-derived                        | SHF-derived                        | CNC-derived   |
| A           | F=2; M=3                           | F=2 M=2                            | F=2; M=3                           | F=2 M=3       |
| B           | F=1; M=3                           | F=2 M=3                            | F=2; M=3                           | F=2 M=3       |
| C           | F=2; M=2                           | F=2 M=2                            | F=2; M=3                           | F=2 M=3       |
| Sup. Fig. 2 | Control <i>TbrI</i> <sup>+/+</sup> | Mutant <i>TbrI</i> <sup>MR/+</sup> |                                    |               |
|             | SHF-derived                        | CNC-derived                        | SHF-derived                        | CNC-derived   |
|             | F=1; M=2                           | F=1 M=2                            | F=2; M=1                           | F=2 M=1       |
| Sup. Fig. 3 | Control <i>TbrI</i> <sup>+/+</sup> |                                    | Mutant <i>TbrI</i> <sup>MR/+</sup> |               |
| A           | F=3; M=1                           |                                    | F=1; M=2                           |               |
| B           | F=0; M=5                           |                                    | F=0; M=5                           |               |
| Sup. Fig. 4 | Control <i>TbrI</i> <sup>+/+</sup> |                                    | Mutant <i>TbrI</i> <sup>MR/+</sup> |               |
| A           | F=10; M=5                          | LOS: F=10; M=8                     | F=5; M=7                           | LOS: F=7; M=8 |
| B           | F=10; M=5                          | LOS: F=10; M=8                     | F=5; M=7                           | LOS: F=7; M=8 |
| C           | F=1; M=1                           |                                    | F=1; M=1                           | LOS=1; M=1    |
| D           | F=3; M=1                           |                                    | F=3; M=0                           | LOS: F=1; M=2 |
| E           | F=1; M=0                           |                                    | F=1; M=0                           | LOS F=0; M=1  |
| Sup. Fig. 5 | Control <i>TbrI</i> <sup>+/+</sup> |                                    | Mutant <i>TbrI</i> <sup>MR/+</sup> |               |
|             | SHF-derived                        | CNC-derived                        | SHF-derived                        | CNC-derived   |
|             | F=3; M=2                           | F=2; M=2                           | F=2; M=3                           | F=2; M=2      |
| Sup. Fig. 6 | Control <i>TbrI</i> <sup>+/+</sup> |                                    | Mutant <i>TbrI</i> <sup>MR/+</sup> |               |
|             | SHF-derived                        | CNC-derived                        | SHF-derived                        | CNC-derived   |
|             | F=2; M=3                           | F=2; M=3                           | F=1; M=3                           | F=1; M=4      |
| Sup. Fig. 7 | Control <i>TbrI</i> <sup>+/+</sup> |                                    | Mutant <i>TbrI</i> <sup>MR/+</sup> |               |
| SHF         | F=5; M=4 (last row F=3; M=3)       |                                    | F=3; M=6 (last row F=2; M=3)       | LOS F=3; M=2  |
| CNC         | F=3; M=10                          |                                    | F=5; M=4                           | LOS F=3; M=1  |
| Sup. Fig. 8 | Control <i>TbrI</i> <sup>+/+</sup> |                                    | Mutant <i>TbrI</i> <sup>MR/+</sup> |               |
|             | F=1 M=0                            |                                    | F=1, M=0                           |               |
| Sup. Fig. 9 | Control <i>TbrI</i> <sup>+/+</sup> |                                    | Mutant <i>TbrI</i> <sup>MR/+</sup> |               |
|             | F=1 M=1                            |                                    | F=2, M=0                           |               |
